# Supplementary material
Source: Springer Nature journal article supplement (https://www.springermedizin.de/resource/supplementary/12885_2012_3812_MOESM9_ESM.pdf/9464510)

**A**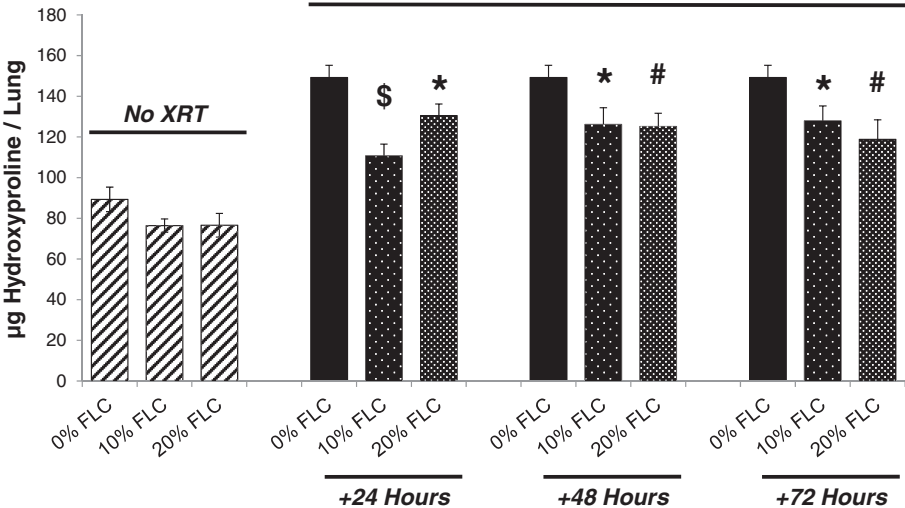**B**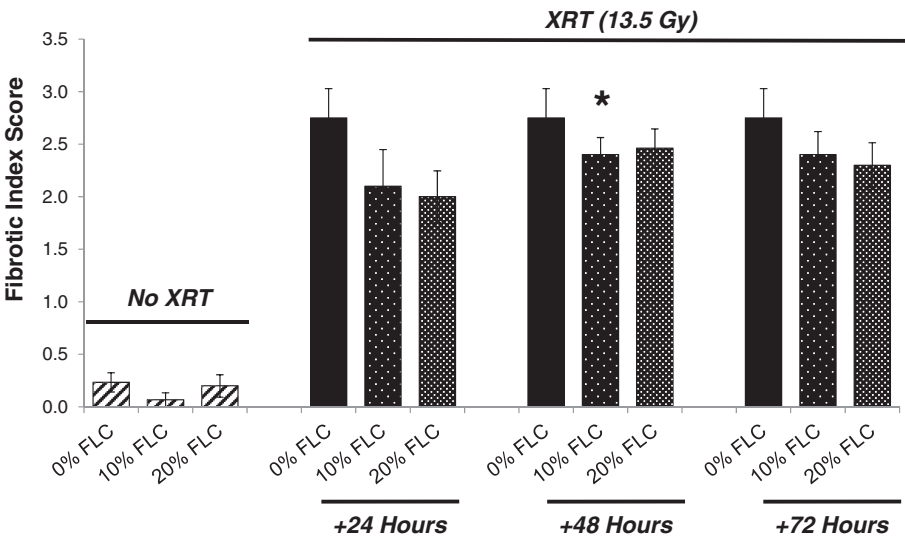

Supplement: MOESM9 [file 9464510]
